# Supplementary material for: Computational Identification of miRNAs and Temperature-Responsive lncRNAs From Mango (Mangifera indica L.)
Source: Front Genet. 2021 Jun 7;12:607248. doi: 10.3389/fgene.2021.607248 (PMC8216217; doi:10.3389/fgene.2021.607248)
Supplement: Supplementary Table 6 — KEGG pathways of the target of cold responsive lncRNAs. [file Table_6.xlsx]

## Sheet: Sheet1
KEGG Pathways of Target of Cold Responsive lncRNAs
Pathway	Pathway ID	Enzymes in Pathway	Enzyme	Sequences of Enzyme	Sequences
Acarbose and validamycin biosynthesis	map00525	1	ec:4.2.1.46 - 4,6-dehydratase	1	JK513658.1
alpha-Linolenic acid metabolism	map00592	4	ec:5.3.99.6 - cyclase, ec:1.3.3.6 - oxidase, ec:3.1.1.32 - A1, ec:1.1.1.1 - dehydrogenase	2, 1, 1, 2	JK513340.1, JK512891.1, KX090182.1, JK512982.1, JK513026.1, CD002005.1
Amino sugar and nucleotide sugar metabolism	map00520	11	ec:4.1.1.35 - decarboxylase, ec:1.1.1.22 - 6-dehydrogenase, ec:5.4.2.8 - mannose phosphomutase, ec:1.1.1.271 - synthase, ec:5.1.3.18 - 3,5-epimerase, ec:2.4.1.43 - 4-alpha-galacturonosyltransferase, ec:5.4.99.30 - mutase, ec:3.2.1.14 - ChiC, ec:5.1.3.12 - 5'-epimerase, ec:2.7.1.1 - hexokinase type IV glucokinase, ec:2.7.1.4 - fructokinase (phosphorylating)	1, 1, 1, 1, 1, 3, 1, 3, 1, 2, 1	JK513658.1, JK512658.1, JK512998.1, JK513432.1, JK512981.1, JK512591.1, JK512586.1, JK512605.1, JK512924.1, EU513279.1, JN588754.1, CX700409.1, JK513791.1, JK513556.1, HO663506.1, HO663506.1
Aminoacyl-tRNA biosynthesis	map00970	2	ec:6.1.1.4 - ligase, ec:6.1.1.3 - ligase	1, 1	JK512517.1, JK513696.1
Aminobenzoate degradation	map00627	1	ec:3.5.1.4 - acylamidase	1	JK513898.1
Arachidonic acid metabolism	map00590	1	ec:1.11.1.9 - peroxidase	1	GU266282.1
Arginine and proline metabolism	map00330	2	ec:3.5.1.4 - acylamidase, ec:4.1.1.50 - decarboxylase	1, 2	JK513898.1, AY651064.1, JK512637.1
Ascorbate and aldarate metabolism	map00053	4	ec:1.1.1.22 - 6-dehydrogenase, ec:1.8.5.1 - dehydrogenase (ascorbate), ec:5.1.3.18 - 3,5-epimerase, ec:2.4.1.17 - 1-naphthol glucuronyltransferase	1, 1, 1, 2	JK512658.1, HO663498.1, JK512981.1, JK512629.1, JK512512.1
Biosynthesis of antibiotics	map01130	34	ec:1.1.1.34 - reductase (NADPH), ec:2.7.4.2 - kinase, ec:2.7.4.6 - kinase, ec:1.1.1.37 - dehydrogenase, ec:2.5.1.21 - synthase, ec:2.5.1.47 - synthase, ec:6.3.3.1 - cyclo-ligase, ec:2.2.1.7 - synthase, ec:1.1.1.267 - reductoisomerase, ec:4.1.1.1 - decarboxylase, ec:2.3.1.12 - acetyltransferase, ec:5.4.2.8 - mannose phosphomutase, ec:2.3.3.8 - citrate synthase, ec:2.5.1.1 - geranyl-diphosphate syn…	1, 1, 2, 1, 2, 1, 1, 1, 1, 7, 1, 1, 1, 2, 1, 1, 2, 4, 2, 2, 1, 2, 2, 1, 2, 2, 5, 2, 1, 2, 1, 1, 1, 2	JK513023.1, JK513499.1, JK513910.1, JK512557.1, JK512827.1, JN001197.1, KT276244.1, JK512997.1, JK513589.1, KT276249.1, KT276252.1, JK513640.1, JK513053.1, JK513449.1, JK513080.1, JK513081.1, JK513893.1, JK512962.1, CD002000.1, JK512998.1, JK512781.1, JN035296.1, EU513268.1, DQ631803.1, CX700417.1, JK512465.1, JK512929.1, JK512943.1, JK513256.1, JK513134.1, JK512490.1, JK513811.1, JK512532.1, JK5…
Biosynthesis of unsaturated fatty acids	map01040	2	ec:1.3.3.6 - oxidase, ec:1.1.1.330 - 3-oxoacyl-CoA reductase	1, 1	KX090182.1, JK513542.1
Biosynthesis of vancomycin group antibiotics	map01055	1	ec:4.2.1.46 - 4,6-dehydratase	1	JK513658.1
Biotin metabolism	map00780	1	ec:1.1.1.100 - reductase	1	JK513850.1
Butanoate metabolism	map00650	1	ec:2.2.1.6 - synthase	1	JK513230.1
C5-Branched dibasic acid metabolism	map00660	2	ec:2.2.1.6 - synthase, ec:6.2.1.5 - ligase (ADP-forming)	1, 1	JK513230.1, JK512781.1
Caffeine metabolism	map00232	1	ec:2.3.1.5 - N-acetyltransferase	1	JK512446.1
Carbon fixation in photosynthetic organisms	map00710	6	ec:1.1.1.37 - dehydrogenase, ec:2.7.2.3 - kinase, ec:5.3.1.1 - isomerase, ec:4.1.2.13 - aldolase, ec:1.1.1.39 - dehydrogenase (decarboxylating), ec:1.1.1.40 - dehydrogenase (oxaloacetate-decarboxylating) (NADP+)	1, 2, 2, 5, 4, 1	JK512827.1, JK512532.1, JK513211.1, JK513329.1, JK513400.1, JK513123.1, JK513841.1, HO663482.1, CB933772.1, JK512960.1, JK512783.1, HO663488.1, JK512522.1, JQ063040.1
Carbon fixation pathways in prokaryotes	map00720	5	ec:1.1.1.37 - dehydrogenase, ec:2.3.3.8 - citrate synthase, ec:6.2.1.1 - ligase, ec:4.2.1.3 - hydratase, ec:6.2.1.5 - ligase (ADP-forming)	1, 1, 2, 2, 1	JK512827.1, JK512781.1, CX700417.1, JK512465.1, JK512490.1, JK513811.1, JK512781.1
Carotenoid biosynthesis	map00906	2	ec:5.3.99.8 - synthase, ec:1.13.11.51 - dioxygenase	1, 1	KP222300.1, JZ532302.1
Chloroalkane and chloroalkene degradation	map00625	1	ec:1.1.1.1 - dehydrogenase	2	JK513026.1, CD002005.1
Citrate cycle (TCA cycle)	map00020	5	ec:1.1.1.37 - dehydrogenase, ec:2.3.1.12 - acetyltransferase, ec:2.3.3.8 - citrate synthase, ec:4.2.1.3 - hydratase, ec:6.2.1.5 - ligase (ADP-forming)	1, 1, 1, 2, 1	JK512827.1, CD002000.1, JK512781.1, JK512490.1, JK513811.1, JK512781.1
Cyanoamino acid metabolism	map00460	1	ec:2.1.2.1 - hydroxymethyltransferase	4	JK512929.1, JK512943.1, JK513256.1, JK513134.1
Cysteine and methionine metabolism	map00270	8	ec:3.3.1.1 - S-adenosylhomocysteine synthase, ec:1.1.1.37 - dehydrogenase, ec:2.5.1.47 - synthase, ec:2.5.1.6 - adenosyltransferase, ec:2.1.1.14 - S-methyltransferase, ec:1.14.17.4 - oxidase, ec:4.4.1.1 - gamma-lyase, ec:4.1.1.50 - decarboxylase	1, 1, 1, 6, 1, 2, 2, 2	JK513626.1, JK512827.1, JK512997.1, JK512438.1, JK513274.1, JK513697.1, JK512747.1, JK513349.1, JK513158.1, JK512795.1, JK512389.1, JK512788.1, CX700403.1, JK512456.1, AY651064.1, JK512637.1
Diterpenoid biosynthesis	map00904	1	ec:1.14.11.13 - 2beta-dioxygenase	2	AB677314.1, JK513161.1
Drug metabolism - cytochrome P450	map00982	3	ec:2.5.1.18 - transferase, ec:2.4.1.17 - 1-naphthol glucuronyltransferase, ec:1.1.1.1 - dehydrogenase	5, 2, 2	JK513643.1, JK513341.1, JK512994.1, JK513646.1, JK513609.1, JK512629.1, JK512512.1, JK513026.1, CD002005.1
Drug metabolism - other enzymes	map00983	5	ec:2.7.4.6 - kinase, ec:2.5.1.18 - transferase, ec:2.3.1.5 - N-acetyltransferase, ec:3.1.1.1 - ali-esterase, ec:2.4.1.17 - 1-naphthol glucuronyltransferase	2, 5, 1, 5, 2	JK513910.1, JK512557.1, JK513643.1, JK513341.1, JK512994.1, JK513646.1, JK513609.1, JK512446.1, JK513384.1, JK513309.1, DQ631803.1, JK512982.1, JZ532320.1, JK512629.1, JK512512.1
Ether lipid metabolism	map00565	1	ec:2.7.8.2 - cholinephosphotransferase	1	JK512861.1
Fatty acid biosynthesis	map00061	2	ec:2.3.1.85 - synthase, ec:1.1.1.100 - reductase	1, 1	JK513850.1, JK513850.1
Fatty acid degradation	map00071	2	ec:1.3.3.6 - oxidase, ec:1.1.1.1 - dehydrogenase	1, 2	KX090182.1, JK513026.1, CD002005.1
Fatty acid elongation	map00062	1	ec:1.1.1.330 - 3-oxoacyl-CoA reductase	1	JK513542.1
Flavonoid biosynthesis	map00941	1	ec:2.3.1.74 - synthase	1	KF956025.1
Fructose and mannose metabolism	map00051	7	ec:5.4.2.8 - mannose phosphomutase, ec:1.1.1.271 - synthase, ec:5.3.1.1 - isomerase, ec:4.1.2.13 - aldolase, ec:2.7.1.11 - phosphohexokinase, ec:2.7.1.1 - hexokinase type IV glucokinase, ec:2.7.1.4 - fructokinase (phosphorylating)	1, 1, 2, 5, 2, 2, 1	JK512998.1, JK513432.1, JK513329.1, JK513400.1, JK513123.1, JK513841.1, HO663482.1, CB933772.1, JK512960.1, JK513216.1, JK513000.1, JK513556.1, HO663506.1, HO663506.1
Galactose metabolism	map00052	6	ec:2.4.1.67 - galactosyltransferase, ec:1.1.3.9 - oxidase, ec:3.2.1.22 - melibiase, ec:2.4.1.82 - galactosyltransferase, ec:2.7.1.11 - phosphohexokinase, ec:2.7.1.1 - hexokinase type IV glucokinase	1, 1, 1, 1, 2, 2	JK513264.1, JK512880.1, JK513264.1, JK512729.1, JK513216.1, JK513000.1, JK513556.1, HO663506.1
Glutathione metabolism	map00480	4	ec:2.5.1.18 - transferase, ec:1.8.5.1 - dehydrogenase (ascorbate), ec:1.11.1.15 - thioredoxin peroxidase, ec:1.11.1.9 - peroxidase	5, 1, 4, 1	JK513643.1, JK513341.1, JK512994.1, JK513646.1, JK513609.1, HO663498.1, JK513574.1, JK513034.1, JK512987.1, JK513042.1, GU266282.1
Glycerolipid metabolism	map00561	1	ec:3.2.1.22 - melibiase	1	JK513264.1
Glycerophospholipid metabolism	map00564	2	ec:2.7.8.2 - cholinephosphotransferase, ec:3.1.1.32 - A1	1, 1	JK512861.1, JK512982.1
Glycine, serine and threonine metabolism	map00260	3	ec:2.1.2.1 - hydroxymethyltransferase, ec:4.4.1.1 - gamma-lyase, ec:1.1.1.1 - dehydrogenase	4, 2, 2	JK512929.1, JK512943.1, JK513256.1, JK513134.1, CX700403.1, JK512456.1, JK513026.1, CD002005.1
Glycolysis / Gluconeogenesis	map00010	11	ec:4.1.1.1 - decarboxylase, ec:2.3.1.12 - acetyltransferase, ec:6.2.1.1 - ligase, ec:2.7.2.3 - kinase, ec:5.3.1.1 - isomerase, ec:4.1.2.13 - aldolase, ec:2.7.1.11 - phosphohexokinase, ec:2.7.1.40 - kinase, ec:2.7.1.1 - hexokinase type IV glucokinase, ec:4.2.1.11 - hydratase, ec:1.1.1.1 - dehydrogenase	7, 1, 2, 2, 2, 5, 2, 1, 2, 1, 2	JK513640.1, JK513053.1, JK513449.1, JK513080.1, JK513081.1, JK513893.1, JK512962.1, CD002000.1, CX700417.1, JK512465.1, JK512532.1, JK513211.1, JK513329.1, JK513400.1, JK513123.1, JK513841.1, HO663482.1, CB933772.1, JK512960.1, JK513216.1, JK513000.1, HO663500.1, JK513556.1, HO663506.1, JK513255.1, JK513026.1, CD002005.1
Glycosaminoglycan biosynthesis - chondroitin sulfate / dermatan sulfate	map00532	1	ec:2.4.1.135 - 3-beta-glucuronosyltransferase	2	JK512629.1, JK512512.1
Glycosaminoglycan biosynthesis - heparan sulfate / heparin	map00534	1	ec:2.4.1.135 - 3-beta-glucuronosyltransferase	2	JK512629.1, JK512512.1
Glycosphingolipid biosynthesis - globo and isoglobo series	map00603	1	ec:3.2.1.22 - melibiase	1	JK513264.1
Glyoxylate and dicarboxylate metabolism	map00630	7	ec:6.2.1.8 - ligase, ec:1.1.1.37 - dehydrogenase, ec:4.1.3.1 - lyase, ec:1.11.1.6 - equilase, ec:6.2.1.1 - ligase, ec:2.1.2.1 - hydroxymethyltransferase, ec:4.2.1.3 - hydratase	2, 1, 1, 1, 2, 4, 2	JK512465.1, JK512390.1, JK512827.1, HO663501.1, CD002000.1, CX700417.1, JK512465.1, JK512929.1, JK512943.1, JK513256.1, JK513134.1, JK512490.1, JK513811.1
Inositol phosphate metabolism	map00562	1	ec:5.3.1.1 - isomerase	2	JK513329.1, JK513400.1
Isoquinoline alkaloid biosynthesis	map00950	1	ec:1.10.3.1 - oxidase	1	GU266283.1
Mannose type O-glycan biosynthesis	map00515	1	ec:2.4.1.135 - 3-beta-glucuronosyltransferase	2	JK512629.1, JK512512.1
Metabolism of xenobiotics by cytochrome P450	map00980	3	ec:2.5.1.18 - transferase, ec:2.4.1.17 - 1-naphthol glucuronyltransferase, ec:1.1.1.1 - dehydrogenase	5, 2, 2	JK513643.1, JK513341.1, JK512994.1, JK513646.1, JK513609.1, JK512629.1, JK512512.1, JK513026.1, CD002005.1
Methane metabolism	map00680	7	ec:1.1.1.37 - dehydrogenase, ec:6.2.1.1 - ligase, ec:2.1.2.1 - hydroxymethyltransferase, ec:1.1.1.284 - dehydrogenase, ec:4.1.2.13 - aldolase, ec:2.7.1.11 - phosphohexokinase, ec:4.2.1.11 - hydratase	1, 2, 4, 2, 5, 2, 1	JK512827.1, CX700417.1, JK512465.1, JK512929.1, JK512943.1, JK513256.1, JK513134.1, JK513610.1, JK513026.1, JK513123.1, JK513841.1, HO663482.1, CB933772.1, JK512960.1, JK513216.1, JK513000.1, JK513255.1
Naphthalene degradation	map00626	1	ec:1.1.1.1 - dehydrogenase	2	JK513026.1, CD002005.1
Neomycin, kanamycin and gentamicin biosynthesis	map00524	1	ec:2.7.1.1 - hexokinase type IV glucokinase	2	JK513556.1, HO663506.1
Nitrogen metabolism	map00910	1	ec:4.2.1.1 - anhydrase	1	JK513565.1
Nitrotoluene degradation	map00633	1	ec:2.3.1.5 - N-acetyltransferase	1	JK512446.1
One carbon pool by folate	map00670	1	ec:2.1.2.1 - hydroxymethyltransferase	4	JK512929.1, JK512943.1, JK513256.1, JK513134.1
Other glycan degradation	map00511	1	ec:3.2.1.24 - alpha-D-mannosidase	3	KM100128.1, KM100127.1, KM100129.1
Oxidative phosphorylation	map00190	1	ec:1.6.99.3 - dehydrogenase	2	JK512471.1, JK512414.1
Pantothenate and CoA biosynthesis	map00770	1	ec:2.2.1.6 - synthase	1	JK513230.1
Pentose and glucuronate interconversions	map00040	5	ec:3.2.1.15 - pectin depolymerase, ec:1.1.1.22 - 6-dehydrogenase, ec:3.1.1.11 - pectin demethoxylase, ec:4.2.2.2 - lyase, ec:2.4.1.17 - 1-naphthol glucuronyltransferase	2, 1, 1, 1, 2	EU805508.1, EU315249.1, JK512658.1, JZ532320.1, AY987389.1, JK512629.1, JK512512.1
Pentose phosphate pathway	map00030	3	ec:3.1.1.31 - phosphogluconolactonase, ec:4.1.2.13 - aldolase, ec:2.7.1.11 - phosphohexokinase	1, 5, 2	DQ631803.1, JK513123.1, JK513841.1, HO663482.1, CB933772.1, JK512960.1, JK513216.1, JK513000.1
Phenylalanine metabolism	map00360	2	ec:3.5.1.4 - acylamidase, ec:1.13.11.27 - dioxygenase	1, 1	JK513898.1, HQ244994.1
Phenylpropanoid biosynthesis	map00940	1	ec:1.11.1.7 - lactoperoxidase	9	JK512778.1, JK513034.1, CD002000.1, JK512987.1, JK513574.1, JK512683.1, GU266282.1, JK512606.1, JK513042.1
Phosphonate and phosphinate metabolism	map00440	1	ec:2.7.8.2 - cholinephosphotransferase	1	JK512861.1
Polyketide sugar unit biosynthesis	map00523	1	ec:4.2.1.46 - 4,6-dehydratase	1	JK513658.1
Porphyrin and chlorophyll metabolism	map00860	4	ec:2.4.1.17 - 1-naphthol glucuronyltransferase, ec:1.3.1.33 - reductase, ec:1.3.3.4 - oxidase, ec:1.3.3.3 - oxidase	2, 1, 1, 2	JK512629.1, JK512512.1, JK513542.1, JK512388.1, CD001995.1, CD002006.1
Propanoate metabolism	map00640	2	ec:6.2.1.1 - ligase, ec:6.2.1.5 - ligase (ADP-forming)	2, 1	CX700417.1, JK512465.1, JK512781.1
Purine metabolism	map00230	7	ec:3.6.1.15 - phosphatase, ec:2.7.4.6 - kinase, ec:6.3.3.1 - cyclo-ligase, ec:2.7.1.25 - kinase, ec:3.6.1.3 - adenylpyrophosphatase, ec:2.7.4.8 - kinase, ec:2.7.1.40 - kinase	35, 2, 1, 1, 11, 1, 1	JK512643.1, JK512468.1, JK512599.1, JK513086.1, JK513869.1, JK513504.1, JK512623.1, Z71276.1, KF768564.1, JK513276.1, JK513741.1, JK513102.1, AI726232.1, JK513886.1, JK513749.1, JK512406.1, KM062061.1, JK512736.1, JK513480.1, JK512646.1, JK512887.1, JK512786.1, JK512673.1, JK512844.1, JK513597.1, JK513591.1, JK513019.1, JK513015.1, JK512796.1, KF768563.1, JK513802.1, JK513675.1, JK512472.1, KM096…
Pyrimidine metabolism	map00240	2	ec:2.7.4.6 - kinase, ec:2.4.2.9 - phosphoribosyltransferase	2, 1	JK513910.1, JK512557.1, JK512932.1
Pyruvate metabolism	map00620	8	ec:1.1.1.37 - dehydrogenase, ec:2.3.1.12 - acetyltransferase, ec:1.1.1.38 - dehydrogenase (oxaloacetate-decarboxylating), ec:6.2.1.1 - ligase, ec:4.4.1.5 - lyase, ec:1.1.1.39 - dehydrogenase (decarboxylating), ec:2.7.1.40 - kinase, ec:1.1.1.40 - dehydrogenase (oxaloacetate-decarboxylating) (NADP+)	1, 1, 4, 2, 8, 4, 1, 1	JK512827.1, CD002000.1, JK512783.1, HO663488.1, JK512522.1, JQ063040.1, CX700417.1, JK512465.1, JK512535.1, JK513643.1, JK512501.1, JK513646.1, JK512994.1, JK512999.1, JK513609.1, CD001999.1, JK512783.1, HO663488.1, JK512522.1, JQ063040.1, HO663500.1, HO663488.1
Retinol metabolism	map00830	2	ec:2.4.1.17 - 1-naphthol glucuronyltransferase, ec:1.1.1.1 - dehydrogenase	2, 2	JK512629.1, JK512512.1, JK513026.1, CD002005.1
Riboflavin metabolism	map00740	1	ec:3.1.3.2 - phosphatase	1	JK513251.1
Selenocompound metabolism	map00450	2	ec:2.1.1.14 - S-methyltransferase, ec:4.4.1.1 - gamma-lyase	1, 2	JK512795.1, CX700403.1, JK512456.1
Sesquiterpenoid and triterpenoid biosynthesis	map00909	1	ec:2.5.1.21 - synthase	2	JN001197.1, KT276244.1
Sphingolipid metabolism	map00600	1	ec:3.2.1.22 - melibiase	1	JK513264.1
Starch and sucrose metabolism	map00500	10	ec:3.2.1.4 - endo-1,4-beta-D-glucanase, ec:2.4.1.13 - synthase, ec:3.1.3.12 - trehalose 6-phosphatase, ec:3.2.1.2 - saccharogen amylase, ec:2.4.1.14 - synthase, ec:2.4.1.18 - branching enzyme, ec:2.7.1.1 - hexokinase type IV glucokinase, ec:2.4.1.12 - synthase (UDP-forming), ec:2.4.1.1 - phosphorylase, ec:2.7.1.4 - fructokinase (phosphorylating)	1, 6, 1, 3, 3, 1, 2, 1, 1, 1	HO663493.1, JQ063041.1, JN001199.1, AJ505603.1, JK513350.1, JK513405.1, AJ505604.1, JK513623.1, JK513447.1, JK513044.1, HM022382.1, JQ063041.1, AJ505604.1, AJ505603.1, HO663460.1, JK513556.1, HO663506.1, JK512676.1, JK512792.1, HO663506.1
Steroid biosynthesis	map00100	2	ec:2.5.1.21 - synthase, ec:5.5.1.9 - cycloisomerase	2, 1	JN001197.1, KT276244.1, JK513268.1
Steroid degradation	map00984	1	ec:1.1.1.145 - dehydrogenase	4	JK513669.1, KF929414.1, JK513455.1, HO663494.1
Steroid hormone biosynthesis	map00140	2	ec:1.1.1.145 - dehydrogenase, ec:2.4.1.17 - 1-naphthol glucuronyltransferase	4, 2	JK513669.1, KF929414.1, JK513455.1, HO663494.1, JK512629.1, JK512512.1
Streptomycin biosynthesis	map00521	2	ec:4.2.1.46 - 4,6-dehydratase, ec:2.7.1.1 - hexokinase type IV glucokinase	1, 2	JK513658.1, JK513556.1, HO663506.1
Styrene degradation	map00643	2	ec:3.5.1.4 - acylamidase, ec:3.7.1.2 - beta-diketonase	1, 4	JK513898.1, JK513855.1, JK512437.1, JK512412.1, JK513760.1
Sulfur metabolism	map00920	2	ec:2.5.1.47 - synthase, ec:2.7.1.25 - kinase	1, 1	JK512997.1, JK513514.1
T cell receptor signaling pathway	map04660	1	ec:3.1.3.16 - phosphatase	4	JK512514.1, CX700396.1, JK513523.1, JK512460.1
Terpenoid backbone biosynthesis	map00900	8	ec:1.1.1.34 - reductase (NADPH), ec:2.7.4.2 - kinase, ec:2.2.1.7 - synthase, ec:1.1.1.267 - reductoisomerase, ec:2.5.1.1 - geranyl-diphosphate synthase, ec:5.3.3.2 - Delta-isomerase, ec:2.5.1.29 - diphosphate synthase, ec:2.5.1.10 - diphosphate synthase	1, 1, 1, 1, 2, 1, 2, 2	JK513023.1, JK513499.1, KT276249.1, KT276252.1, JN035296.1, EU513268.1, EU513264.1, JN001197.1, KT276244.1, JN035296.1, EU513268.1
Th1 and Th2 cell differentiation	map04658	1	ec:3.1.3.16 - phosphatase	4	JK512514.1, CX700396.1, JK513523.1, JK512460.1
Thiamine metabolism	map00730	3	ec:3.6.1.15 - phosphatase, ec:2.2.1.7 - synthase, ec:3.1.3.2 - phosphatase	35, 1, 1	JK512643.1, JK512468.1, JK512599.1, JK513086.1, JK513869.1, JK513504.1, JK512623.1, Z71276.1, KF768564.1, JK513276.1, JK513741.1, JK513102.1, AI726232.1, JK513886.1, JK513749.1, JK512406.1, KM062061.1, JK512736.1, JK513480.1, JK512646.1, JK512887.1, JK512786.1, JK512673.1, JK512844.1, JK513597.1, JK513591.1, JK513019.1, JK513015.1, JK512796.1, KF768563.1, JK513802.1, JK513675.1, JK512472.1, KM096…
Tryptophan metabolism	map00380	2	ec:3.5.1.4 - acylamidase, ec:1.11.1.6 - equilase	1, 1	JK513898.1, CD002000.1
Tyrosine metabolism	map00350	4	ec:1.10.3.1 - oxidase, ec:1.13.11.27 - dioxygenase, ec:3.7.1.2 - beta-diketonase, ec:1.1.1.1 - dehydrogenase	1, 1, 4, 2	GU266283.1, HQ244994.1, JK513855.1, JK512437.1, JK512412.1, JK513760.1, JK513026.1, CD002005.1
Ubiquinone and other terpenoid-quinone biosynthesis	map00130	1	ec:1.13.11.27 - dioxygenase	1	HQ244994.1
Valine, leucine and isoleucine biosynthesis	map00290	2	ec:4.2.1.33 - dehydratase, ec:2.2.1.6 - synthase	1, 1	JK512995.1, JK513230.1
Vitamin B6 metabolism	map00750	1	ec:3.1.3.74 - phosphatase	1	JK513843.1
Zeatin biosynthesis	map00908	1	ec:1.5.99.12 - dehydrogenase	2	JK512567.1, JK512715.1
