# Supplementary material for: Computational Identification of miRNAs and Temperature-Responsive lncRNAs From Mango (Mangifera indica L.)
Source: Front Genet. 2021 Jun 7;12:607248. doi: 10.3389/fgene.2021.607248 (PMC8216217; doi:10.3389/fgene.2021.607248)
Supplement: Supplementary Table 9 — Cold responsive lncRNAs as target mimic of miRNAs. [file Table_9.xlsx]

## Sheet: coldmimicdata
Cold Responsive lncRNAs as Target Mimic of miRNAs
miRNA_name	miRNA_family	mimic_name
MmiR5408	bdi-miR2275b	CRlnc31221_1
MmiR6929	gma-miR1533	CRlnc10771_1
MmiR8306	stu-miR8030-3p	CRlnc41038_1
MmiR16258	lja-miR11108m-3p	CRlnc22055_1
MmiR17463	stu-miR8002-3p	CRlnc36082_1
MmiR17463	stu-miR8002-3p	CRlnc36622_1
MmiR17542	ath-miR836	CRlnc9391_1
MmiR17965	gma-miR9754	CRlnc31686_1
MmiR33995	aly-miR829-5p	CRlnc41864_1
MmiR35390	mdm-miR11004	CRlnc32800_1
MmiR49802	ath-miR5632-3p	CRlnc26835_1
MmiR55287	sbi-miR6232b-5p	CRlnc44251_1
MmiR68471	osa-miR5156	CRlnc23940_1
MmiR68478	osa-miR5156	CRlnc23940_1
MmiR73030	ath-miR5021	CRlnc11362_2
MmiR73030	ath-miR5021	CRlnc11772_1
MmiR73030	ath-miR5021	CRlnc47855_1
MmiR73037	ath-miR5021	CRlnc11362_2
MmiR73037	ath-miR5021	CRlnc11772_1
MmiR74824	bdi-miR5185m-3p	CRlnc27151_1
MmiR78769	lja-miR11102-3p	CRlnc1996_1
MmiR91196-2	mtr-miR2657	CRlnc37816_1
MmiR91212	mtr-miR2657	CRlnc37816_1
MmiR103890	nta-miR479b	CRlnc47250_1
